# Supplementary material
Source: PubMed Central journal article supplement (PMC8008754)
Supplement: NEJMoa2102214_data-sharing.pdf [file NEJMoa2102214_data-sharing.pdf]

## Data Sharing Statement

Madhi SA, Baillie V, Cutland CL, et al. Efficacy of the ChAdOx1 nCoV-19 Covid-19 Vaccine against the B.1.351 Variant. N Engl J Med. DOI: 10.1056/NEJMoa2102214.

| Question                                                            | Authors' Response                                                                                                                                                                                             |
|---------------------------------------------------------------------|---------------------------------------------------------------------------------------------------------------------------------------------------------------------------------------------------------------|
| Will the data collected for your study be made available to others? | Yes                                                                                                                                                                                                           |
| Would you like to offer context for your decision?                  | —                                                                                                                                                                                                             |
| Which data?                                                         | Complete de-identified patient data set                                                                                                                                                                       |
| Additional information about data                                   | —                                                                                                                                                                                                             |
| How or where can the data be obtained?                              | Data will be made available upon request from the study statistician Dr Alane Izu (alane.izu@wits-vida.                                                                                                       |
| When will data availability begin?                                  | One year after trial completion                                                                                                                                                                               |
| When will data availability end?                                    | indefinite                                                                                                                                                                                                    |
| Will any supporting documents be available?                         | —                                                                                                                                                                                                             |
| Which supporting documents?                                         | Analytic/Statistical code. Informed Consent Form                                                                                                                                                              |
| Additional information about supporting documents                   | —                                                                                                                                                                                                             |
| How or where can supporting documents be obtained?                  | Documents will be posted on the wits-vida website (enabled by month and as being re-engineered) or will be made available upon request from the Principal Investigator Shabir Madhi - shabir.madhi@wits.ac.za |
| When will supporting documents availability begin?                  | With publication                                                                                                                                                                                              |
| When will supporting documents availability end?                    | indefinite                                                                                                                                                                                                    |
| To whom will data be available?                                     | Researchers whose proposed use if approved, including by the University of Witwatersrand Ethics committee as is the local requirement                                                                         |
| For what type of analysis or purpose?                               | Any purpose to promote good science                                                                                                                                                                           |
| By what mechanism?                                                  | With investigator support, after approval of a proposal, and with a signed data access agreement).                                                                                                            |
| Any other restrictions?                                             | Not to be used for commercial purposes unless agreement with institution                                                                                                                                      |
| Additional information                                              | No                                                                                                                                                                                                            |

This statement was posted on March 16, 2021, at NEJM.org.
